# Supplementary material
Source: HighWire-hosted journal article supplement (https://jnm.snmjournals.org/highwire/filestream/94847/field_highwire_adjunct_files/0/163295_Supplemental_Data.pdf)
Supplement: 163295_Supplemental_Data.pdf [file 163295_Supplemental_Data.pdf]

**Supplemental Table 1.** Distribution of recurrence sites with number of PET lesions in each group.

| Recurrence site    | All subjects<br>(n = 81) |                     | FDG avid tumor<br>group (n = 57) |                     | FDG non-avid tumor<br>group (n = 24) |                     |
|--------------------|--------------------------|---------------------|----------------------------------|---------------------|--------------------------------------|---------------------|
|                    | Single<br>organ          | Multiple<br>organs* | Single<br>organ                  | Multiple<br>organs* | Single<br>organ                      | Multiple<br>organs* |
| Anastomosis site** | 5(4)                     | 3(2)                | 3(2)                             | 1(1)                | 2(2)                                 | 2(1)                |
| Abdominal LN(s)    | 13(10)                   | 3(3)                | 12(9)                            | 3(3)                | 1(1)                                 | 0                   |
| Peritoneum         | 12(6)                    | 7(5)                | 7(5)                             | 6(5)                | 5(1)                                 | 1(0)                |
| Liver              | 6(5)                     | 2(1)                | 4(4)                             | 1(1)                | 2(1)                                 | 1(0)                |
| Bowel              | 5(3)                     | 2(0)                | 1(1)                             | 1(0)                | 4(2)                                 | 1(0)                |
| Adrenal gland      | 1(0)                     | 0                   | 1(0)                             | 0                   | 0                                    | 0                   |
| Pancreas           | 1(1)                     | 0                   | 1(1)                             | 0                   | 0                                    | 0                   |
| Ovary              | 1(0)                     | 2(2)                | 0                                | 2(2)                | 1(0)                                 | 0                   |
| Uterus             | 1(1)                     | 0                   | 0                                | 0                   | 1(1)                                 | 0                   |
| Ureter             | 1(0)                     | 0                   | 0                                | 0                   | 1(0)                                 | 0                   |
| Incision site      | 0                        | 1(1)                | 0                                | 1(1)                | 0                                    | 0                   |
| Lung               | 1(1)                     | 1(1)                | 1(1)                             | 1(1)                | 0                                    | 0                   |
| Distant LN(s)      | 3(3)                     | 5(5)                | 2(2)                             | 4(4)                | 1(1)                                 | 1(1)                |
| Pleura             | 1(1)                     | 1(1)                | 1(1)                             | 1(1)                | 0                                    | 0                   |
| Bone               | 1(1)                     | 1(1)                | 1(1)                             | 1(1)                | 0                                    | 0                   |
| Brain              | 1(1)                     | 0                   | 1(1)                             | 0                   | 0                                    | 0                   |
| Total              | 53(37)                   | 28(22)              | 35(28)                           | 22(18)              | 18(9)                                | 6(2)                |

\*, denotes number of recurrent lesions in the site among patients with recurrence in multiple organs; \*\*, anastomosis site or remnant stomach; LN, lymph node; parenthesis indicate number of PET positive recurrent lesions.
